# Supplementary material for: Synthesis and photoluminescence of three-dimensional europium-complexed graphene macroassembly
Source: Royal Society of Chemistry journal article supplement (doi:10.1039/c3tc30732h), 2013-01-01
Supplement: c3tc30732h.pdf [file c3tc30732h.pdf]

## Supporting information

### Synthesis and Photoluminescence of three-dimensional Europium-Complexed Graphene macroassembly

Dongdong Wang,<sup>a†</sup> Hui Gao,<sup>\*a†</sup> Ehmet Roze,<sup>a</sup> Ke Qu,<sup>a</sup> Wenjing Liu,<sup>a</sup> Yu Shao,<sup>b</sup> Shuangyu

Xin,<sup>a</sup> Yanzhao Wang,<sup>a</sup>

---

<sup>a</sup> School of Physical and Technology, Key Laboratory for Magnetism and Magnetic Materials of Ministry of Education, Lanzhou University, Lanzhou 730000, P. R. China.  
E-mail: hope@lzu.edu.cn;

TFax: +81 931 8913554; el: +81 931 8912772.

<sup>b</sup> Department of Materials of Science and Engineering, University of Science and Technology of China, Hefei, 230026, China.

<sup>†</sup>These authors contribute equally to the article.

#### Supporting figures.

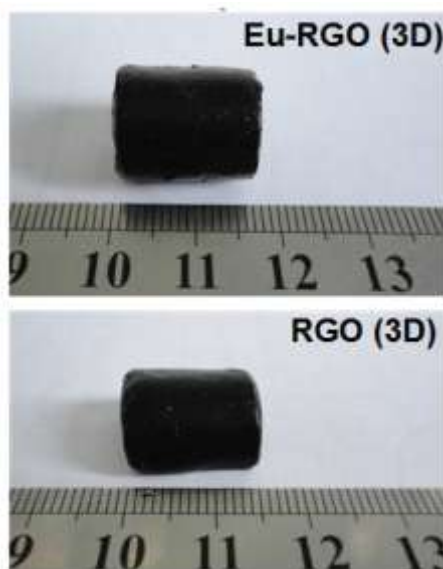

**S1** Digital photos of Eu-RGO (3D) and RGO (3D). The diameters of Eu-RGO (3D) and RGO (3D) hydrogel cylinders are 1.2 and 1.1 cm, respectively. And the heights of Eu-RGO (3D) and RGO (3D) hydrogel cylinders are 1.7 and 1.5 cm.

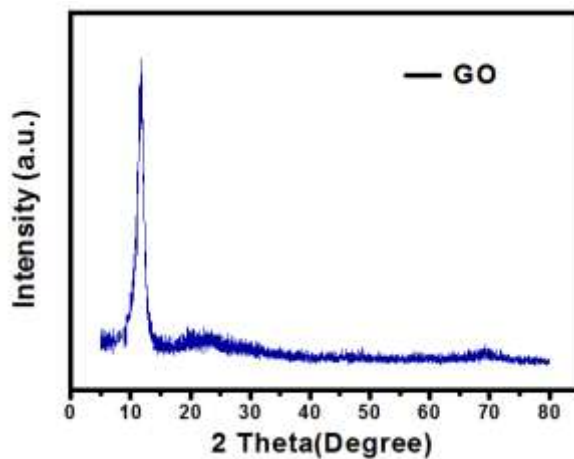

S2 XRD pattern of GO.

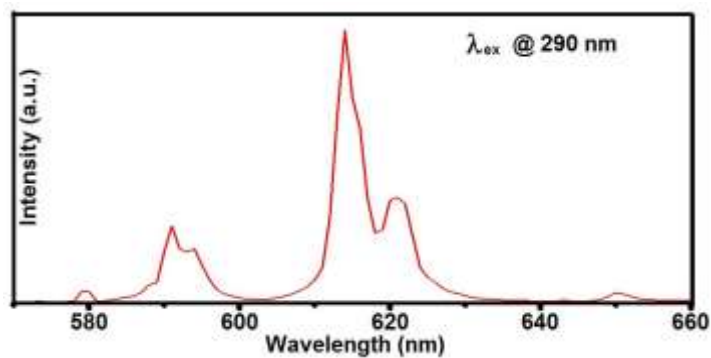

S3 PL spectrum of EuCl<sub>3</sub> (excitation at 290 nm).

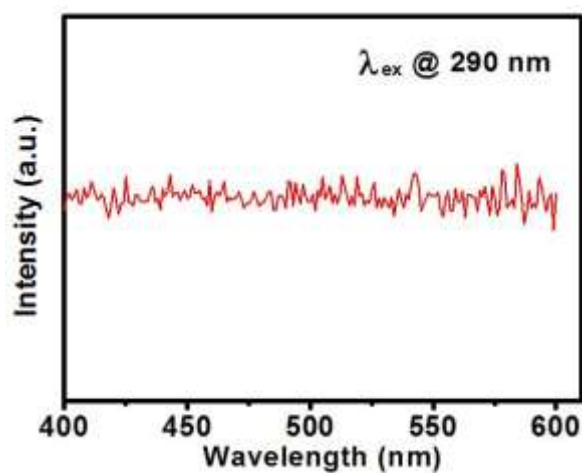

S4 PL spectrum of RGO (3D) (excitation at 290 nm).

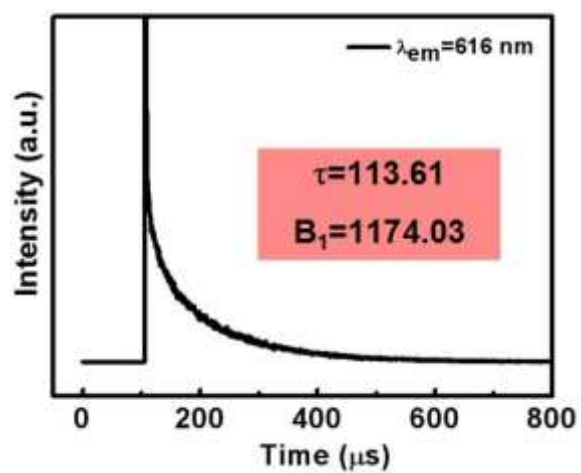

**S5** Decay curve of the precursor  $\text{EuCl}_3$  while monitoring the emission at 616 nm at an excitation wavelength of 290 nm.
